# Supplementary material for: Simultaneous sensing of ferritin and apoferritin proteins using an iron-responsive dye and evaluation of physiological parameters associated with serum iron estimation
Source: Royal Society of Chemistry journal article supplement (doi:10.1039/c8tb01523f), 2018-12-17
Supplement: c8tb01523f1.pdf [file c8tb01523f1.pdf]

Supporting Information for

**Simultaneous Sensing of Ferritin and Apoferritin Proteins Using an Iron-Responsive Dye  
and Evaluation of Physiological Parameters Associated with Serum Iron Estimation**

Nilanjan Dey,<sup>a</sup> Asfa Ali,<sup>a</sup> Mohini Kamra<sup>a</sup> and Santanu Bhattacharya\*<sup>a,b</sup>

<sup>a</sup>Department of Organic Chemistry, Indian Institute of Science, Bangalore 560 012, India.

<sup>b</sup>Indian Association for Cultivation of Science, Jadavpur, Kolkata 700032, India

Email: sb23in@yahoo.com

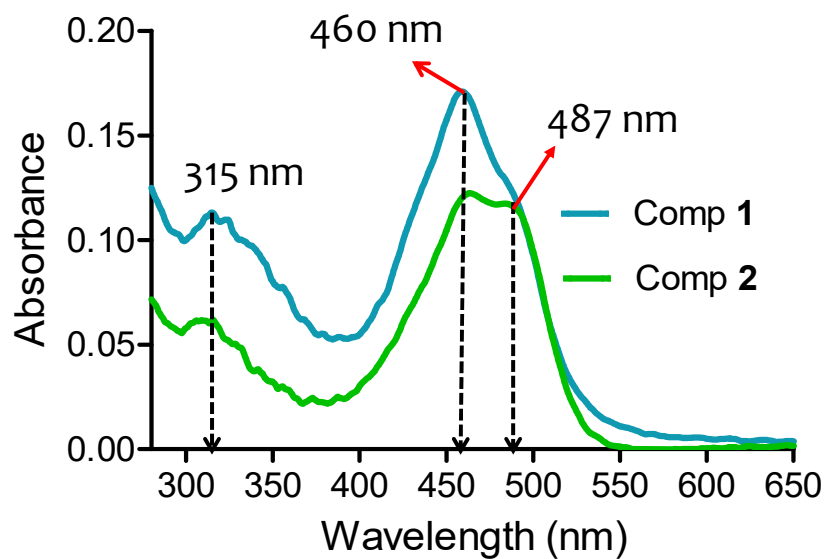

**Figure S1.** UV-visible spectra of compounds 1 and 2 at pH 7.4 in water.

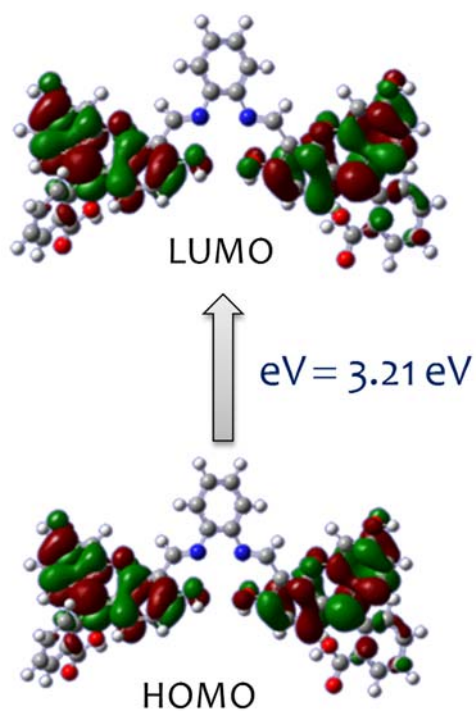

**Figure S2.** FMO analysis of compound 1 using B<sub>3</sub>LYP/6-31G\* method.

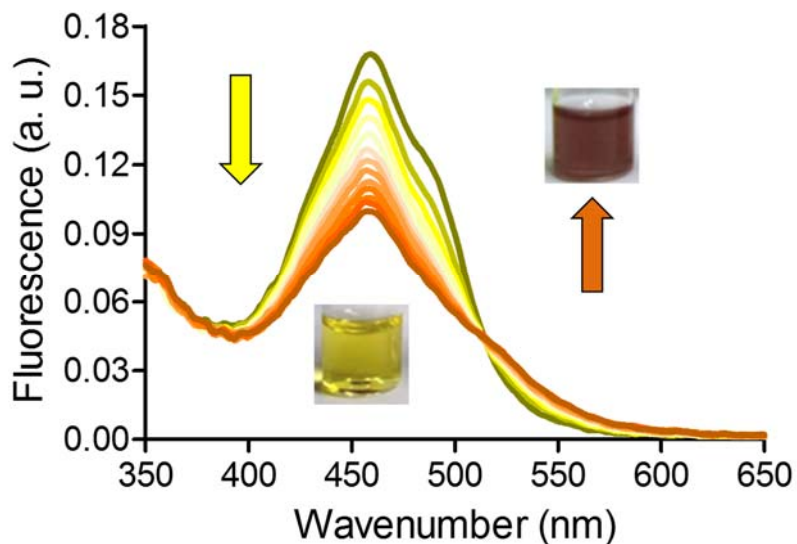

**Figure S3.** UV-visible titration of **1** (10  $\mu\text{M}$ ) with  $\text{Fe}^{2+}$  (0-10  $\mu\text{M}$ ) at pH 7.4 in water

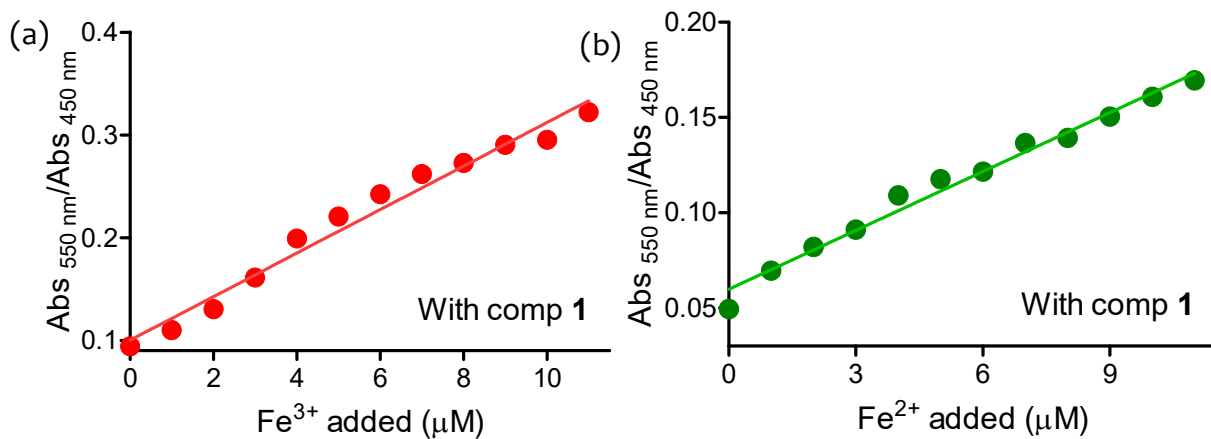

**Figure S4.** (a) Ratiometric variation in absorbance of **1** (10  $\mu\text{M}$ ) during titration with  $\text{Fe}^{3+}$  (0-10  $\mu\text{M}$ ) at pH 7.4 in water; (b) Ratiometric variation in absorbance of **1** (10  $\mu\text{M}$ ) during titration with  $\text{Fe}^{2+}$  (0-10  $\mu\text{M}$ ) at pH 7.4 in water.

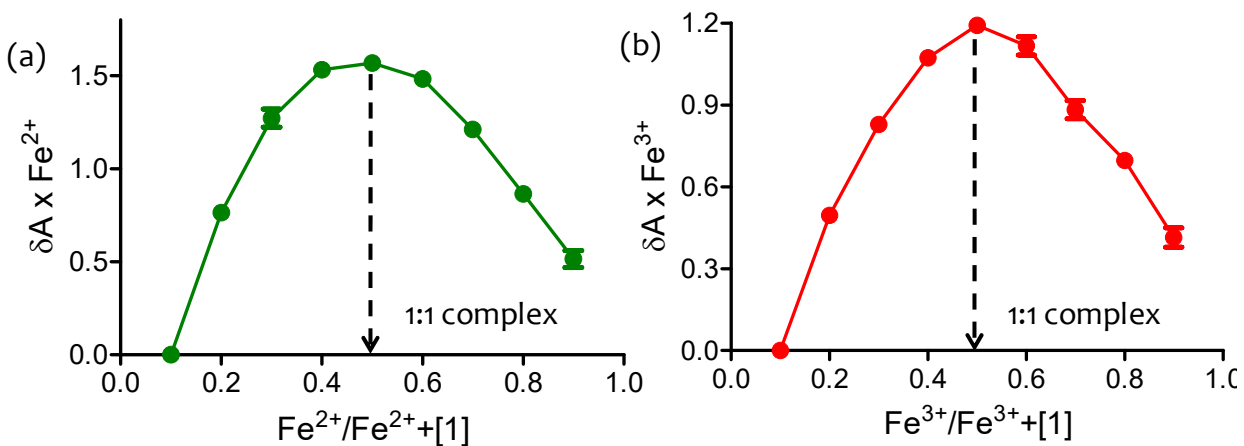

**Figure S5.** (a) Determination of stoichiometry of interaction of **1** with  $Fe^{2+}$  at pH 7.4 in water; (b) Determination of stoichiometry of interaction of **1** with  $Fe^{2+}$  at pH 7.4 in water

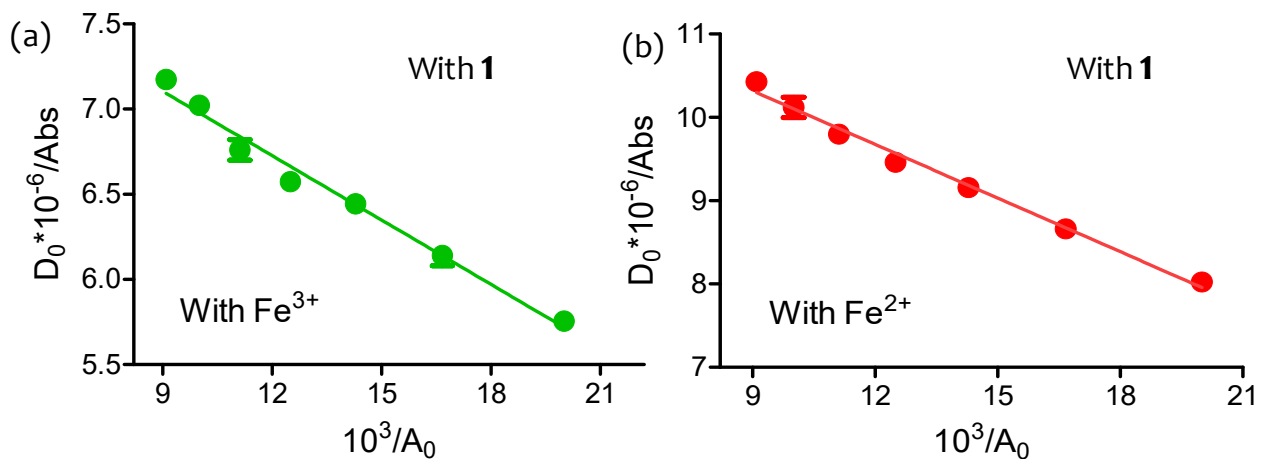

**Figure S6.** (a) Determination of binding constant of **1** with  $Fe^{3+}$  at pH 7.4 in water based on 1:1 binding model; (b) Determination of binding constant of **1** with  $Fe^{2+}$  at pH 7.4 in water based on 1:1 binding model

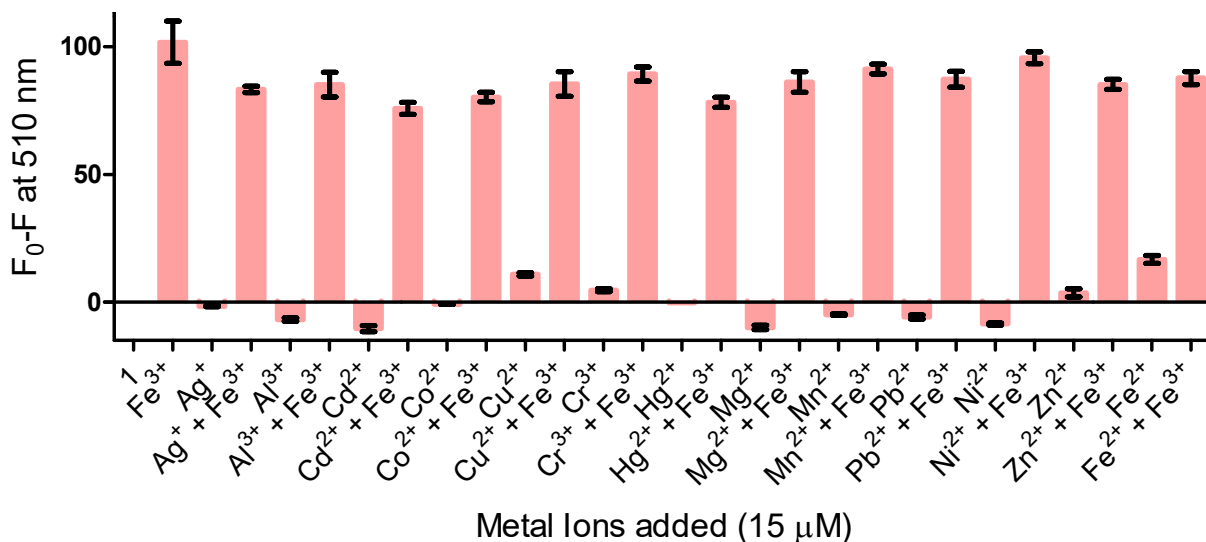

**Figure S7.** Change in emission intensity of **1** (10 μM,  $\lambda_{ex} = 457$  nm) at 510 nm upon addition of Fe<sup>3+</sup> (10 μM) in presence of different metal ions (15 μM) at pH 7.4 in water.

**Calculation of Stern-Volmer quenching constant:** For collisional quenching, the Stern-Volmer equation is,  $F_0/F = 1 + K_{SV}[Fe^{3+}]$  where  $F_0$  and  $F$  are the fluorescence intensities observed in the absence and presence, respectively, of quencher,  $[Fe^{3+}]$  is the quencher concentration and  $K_{SV}$  is the Stern-Volmer quenching constant. Thus, a plot of  $F_0/F$  versus  $[Fe^{3+}]$  should yield a straight line with a slope equal to  $K_{SV}$ .

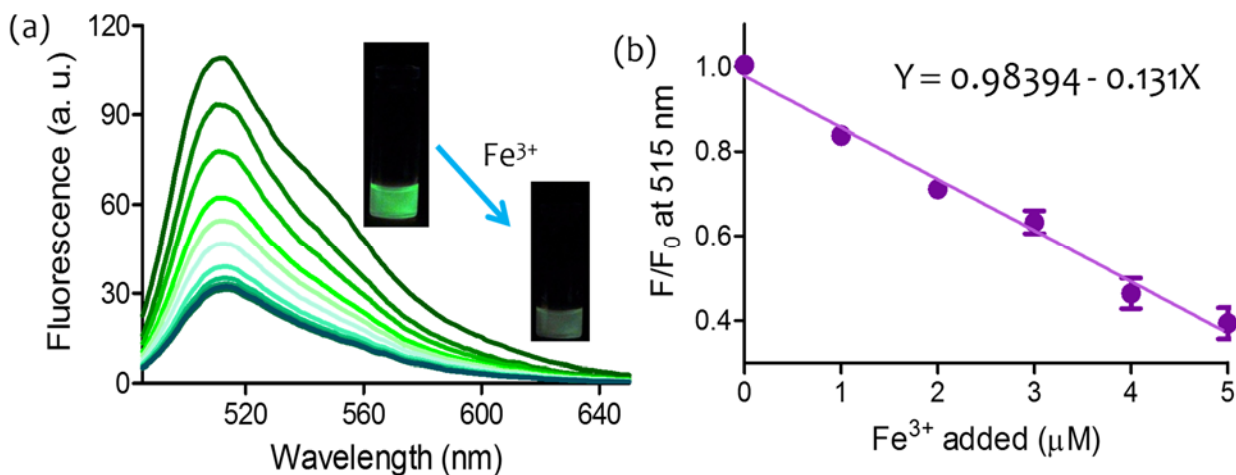

**Figure S8.** (a) Fluorescence titration of **1** (10 μM,  $\lambda_{ex} = 457$  nm) with Fe<sup>3+</sup> (0-10 μM) at pH 7.4 in water. (b) Change in emission intensity of **1** (10 μM,  $\lambda_{ex} = 457$  nm) at 515 nm upon addition of Fe<sup>3+</sup> (0-10 μM) at pH 7.4 in water.

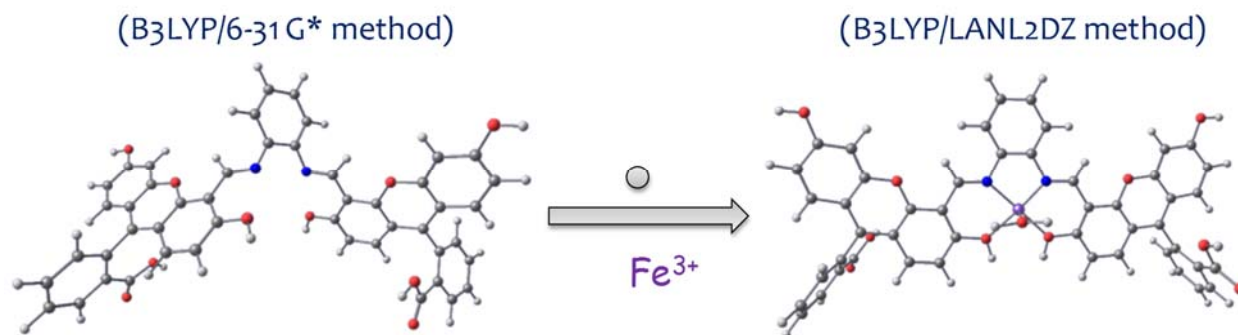

**Figure S9.** Energy minimized structures of compound **1** and **1+Fe<sup>3+</sup>** using B3LYP/6-31G\* level of theory (LANL2DZ for Fe).

| System                    | Müllikan charge                                      | Dihedral angles       | Binding energy (eV) | HOMO-LUMO gap (eV)          | Internal energy (a. u.) |
|---------------------------|------------------------------------------------------|-----------------------|---------------------|-----------------------------|-------------------------|
| <b>1</b>                  | O1: -0.432<br>O2: -0.428<br>N1: -0.596<br>N2: -0.554 | < N-C-C-O<br>= 10.28° | -                   | 3.21 eV<br><br>(f = 0.0718) | -2678.29                |
| <b>1+ Fe<sup>3+</sup></b> | O1: -0.230<br>O2: -0.278<br>N1: -0.331<br>N2: -0.305 | < N-C-C-O<br>= 0.08°  | 3.71 eV             | 1.54 eV<br><br>(f = 0.1030) | -2831.15                |

**Table S1.** Structural parameters of **1** and **1+Fe<sup>3+</sup>** using B3LYP/6-31G\* level of theory (LANL2DZ for Fe)

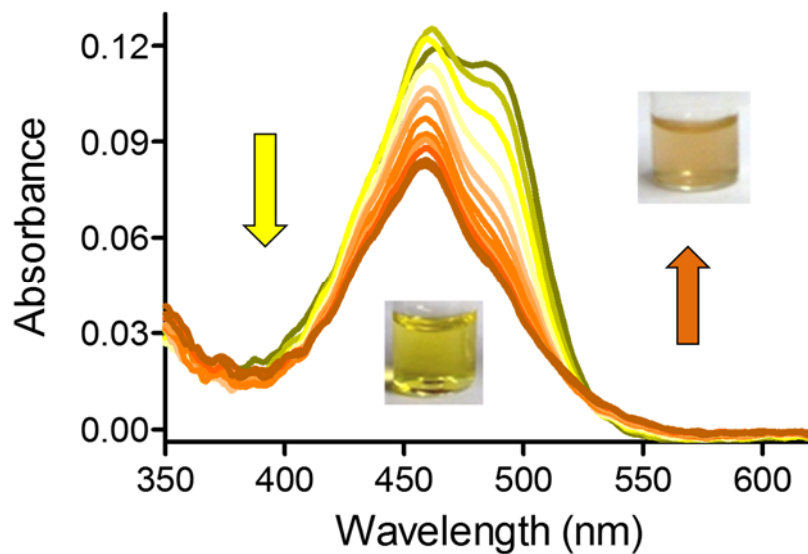

**Figure S10.** UV-visible titration of **2** (10  $\mu\text{M}$ ) with  $\text{Fe}^{2+}$  (0-10  $\mu\text{M}$ ) at pH 7.4 in water

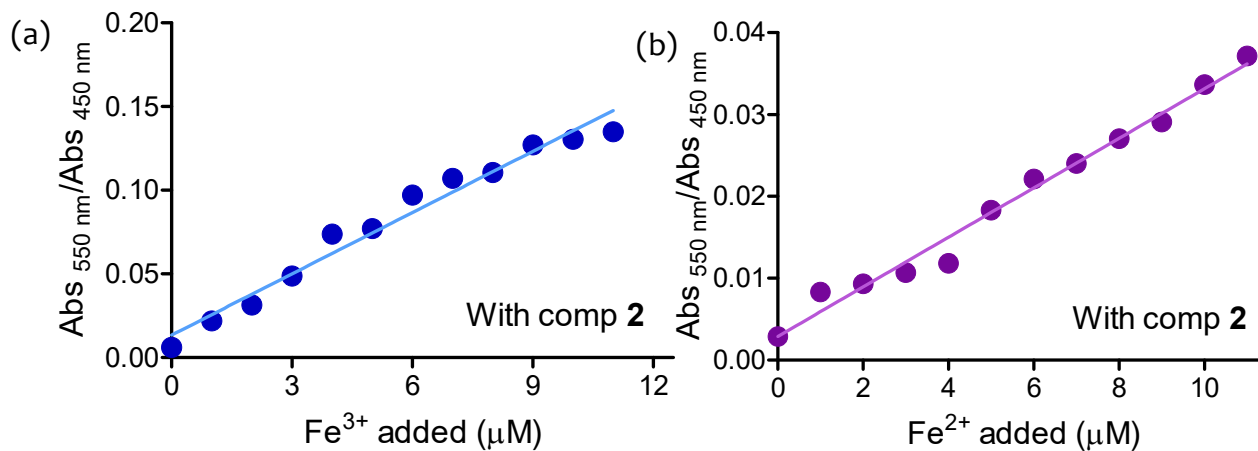

**Figure S11.** (a) Ratiometric variation in absorbance of **2** (10  $\mu\text{M}$ ) during titration with  $\text{Fe}^{3+}$  (0-10  $\mu\text{M}$ ) at pH 7.4 in water; (b) Ratiometric variation in absorbance of **2** (10  $\mu\text{M}$ ) during titration with  $\text{Fe}^{2+}$  (0-10  $\mu\text{M}$ ) at pH 7.4 in water

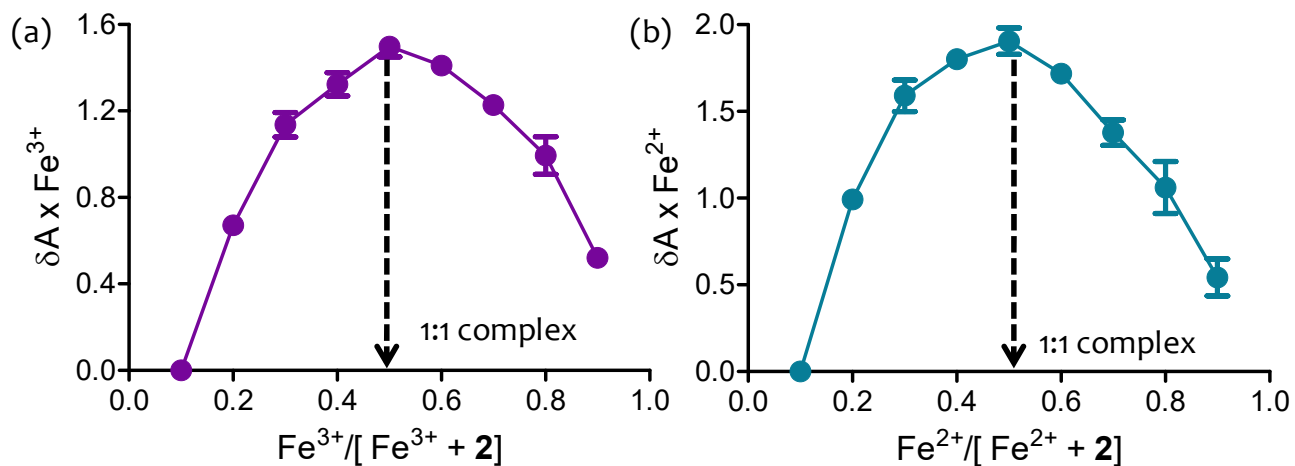

**Figure S12.** (a) Determination of stoichiometry of interaction of **2** with  $Fe^{3+}$  at pH 7.4 in water; (b) Determination of stoichiometry of interaction of **2** with  $Fe^{2+}$  at pH 7.4 in water

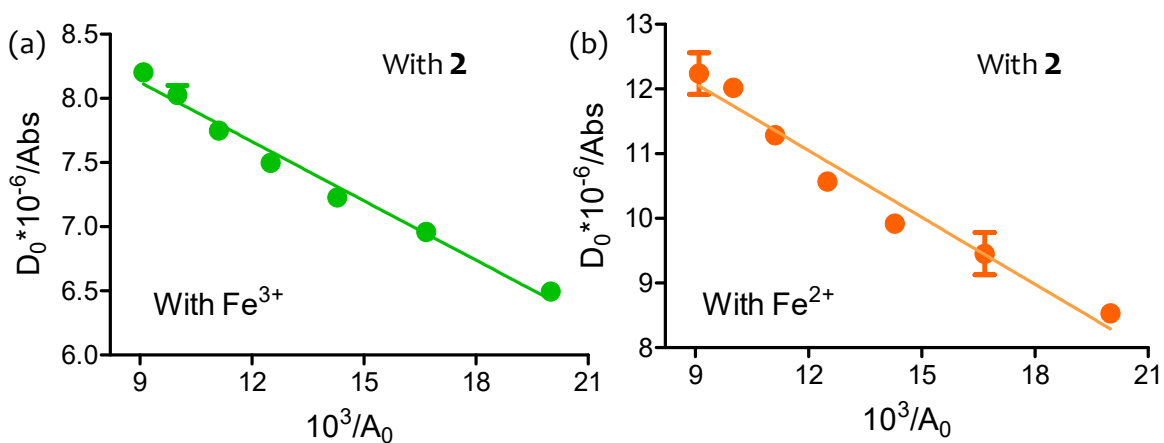

**Figure S13.** (a) Determination of binding constant of **2** with  $Fe^{3+}$  at pH 7.4 in water based on 1:1 binding model; (b) Determination of binding constant of **2** with  $Fe^{2+}$  at pH 7.4 in water based on 1:1 binding model



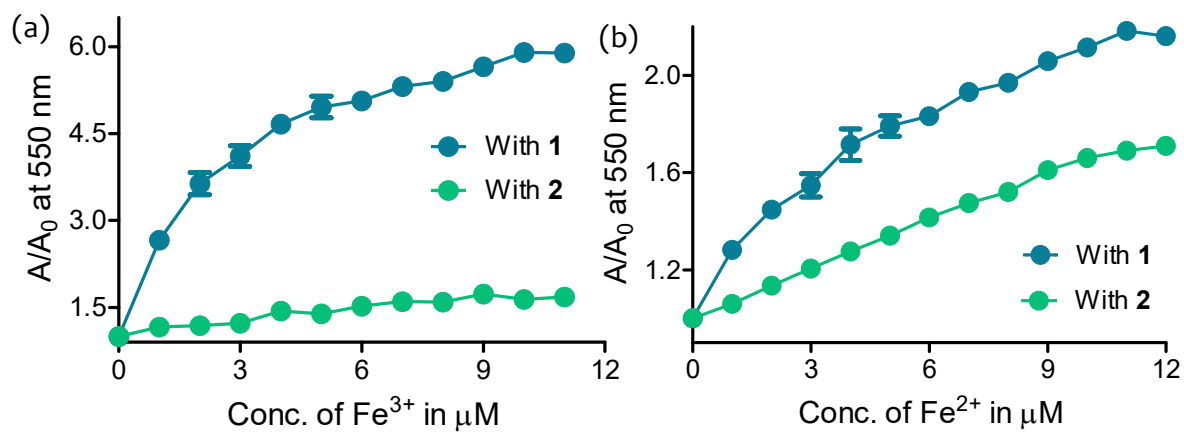

**Figure S14.** (a) Change in absorbance of 1 and 2 (10  $\mu\text{M}$ ) at 550 nm upon addition of  $\text{Fe}^{3+}$  (0-11  $\mu\text{M}$ ) at pH 7.4 in water; (b) Change in absorbance of 1 and 2 (10  $\mu\text{M}$ ) at 550 nm upon addition of  $\text{Fe}^{2+}$  (0-11  $\mu\text{M}$ ) at pH 7.4 in water

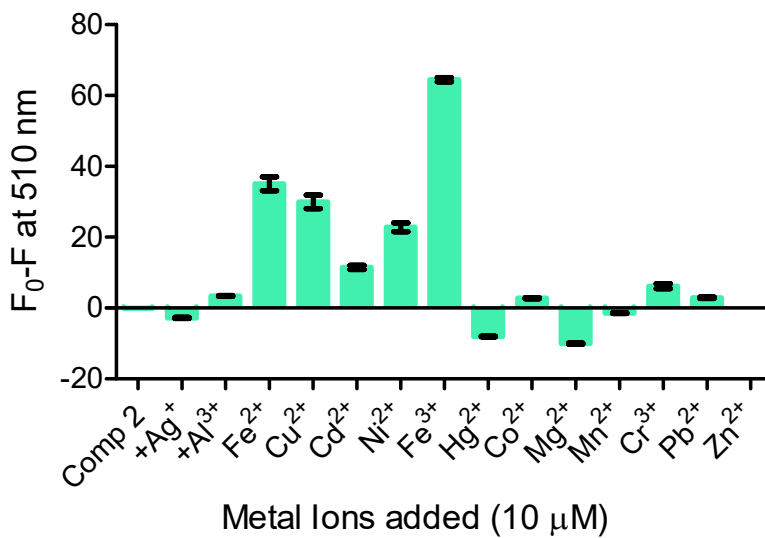

**Figure S15.** Change in fluorescence of 2 (10  $\mu\text{M}$ ,  $\lambda_{\text{ex}} = 457 \text{ nm}$ ) at 510 nm with different metal ions (10  $\mu\text{M}$ ) at pH 7.4 in water.

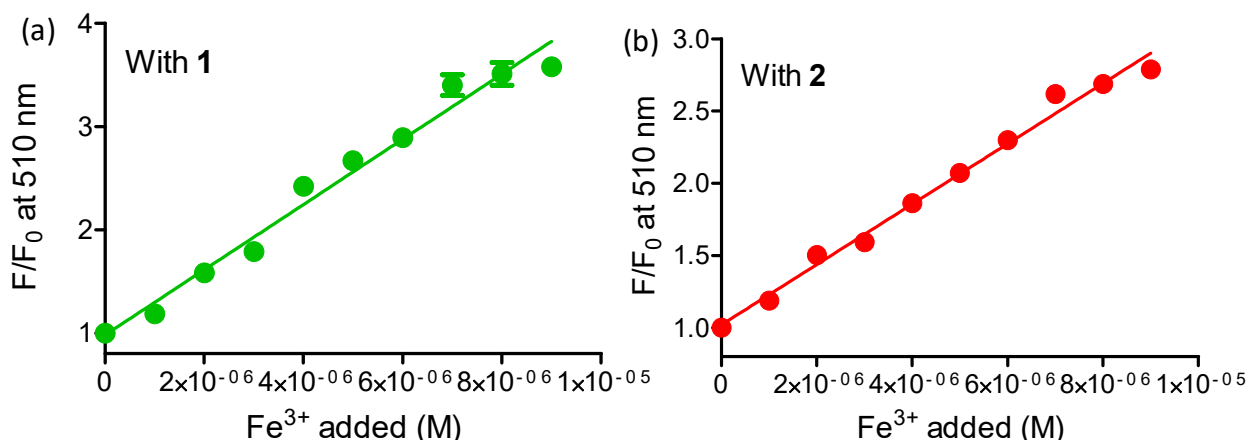

**Figure S16.** (a) Change in fluorescence of **1** (10 μM) at 510 nm upon addition of Fe<sup>3+</sup> (0-11 μM) at pH 7.4 in water; (b) Change in fluorescence of **1** (10 μM) at 510 nm upon addition of Fe<sup>2+</sup> (0-11 μM) at pH 7.4 in water

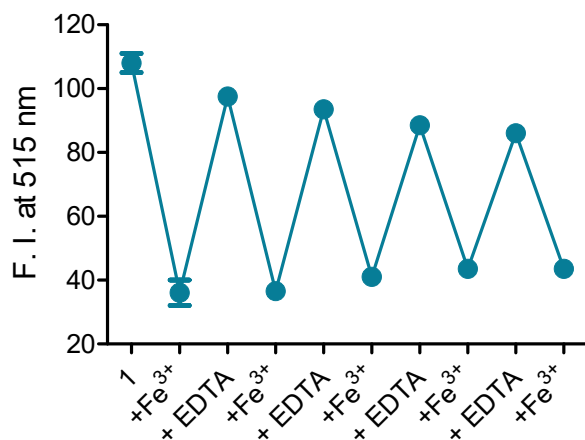

**Figure S17.** Change in fluorescence intensity of **1** (10 μM, λ<sub>ex</sub> = 457 nm) at 515 nm upon sequential addition of Fe<sup>3+</sup> (10 μM) and EDTA (10 μM) at pH 7.4 in water

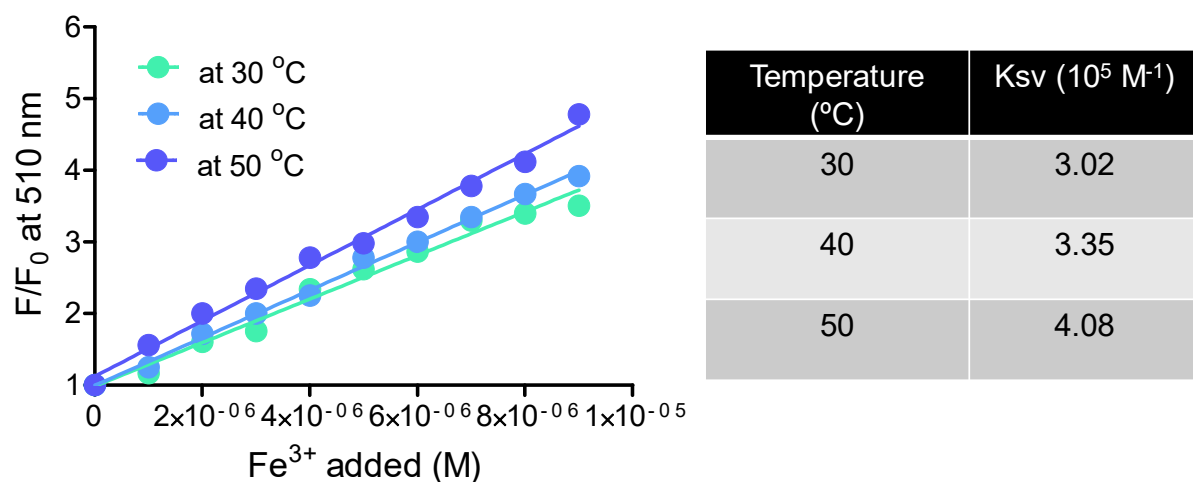

**Figure S17.** Determination of Stern-Volmer quenching constant of **1** (10  $\mu\text{M}$ ,  $\lambda_{\text{ex}} = 457 \text{ nm}$ ) at 510 nm upon addition of  $\text{Fe}^{3+}$  (10  $\mu\text{M}$ ) at different temperature at pH 7.4 in water

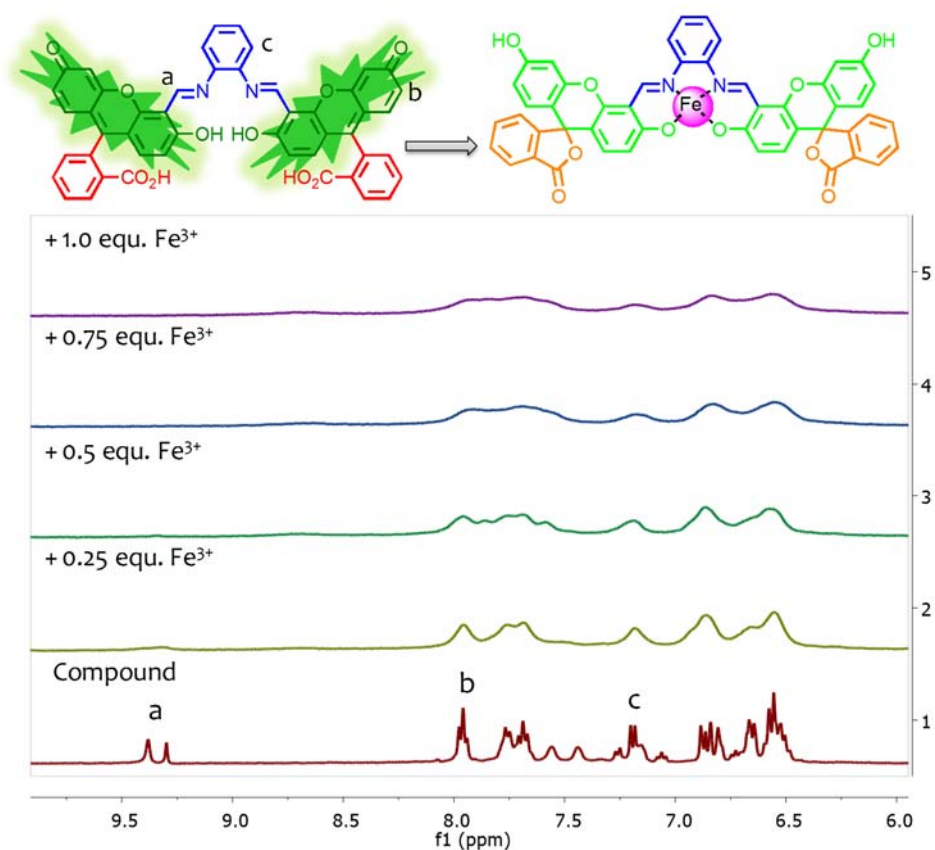

**Figure S18.** Partial  $^1\text{H-NMR}$  spectra of **1** (5 mM) upon addition of  $\text{Fe}^{3+}$  (0-5 mM) DMSO- $d_6$ / $\text{D}_2\text{O}$  mixture (3:2) medium

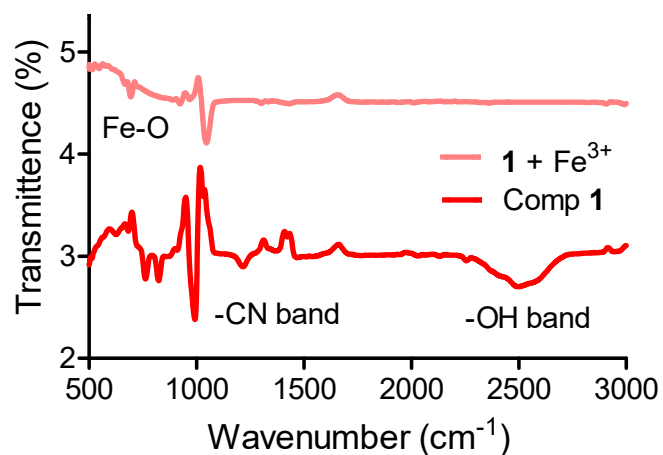

Figure S19. FT-IR spectra of **1** (0.5 mM) in presence of  $\text{Fe}^{3+}$  (0.5 mM) at pH 7.4 in water

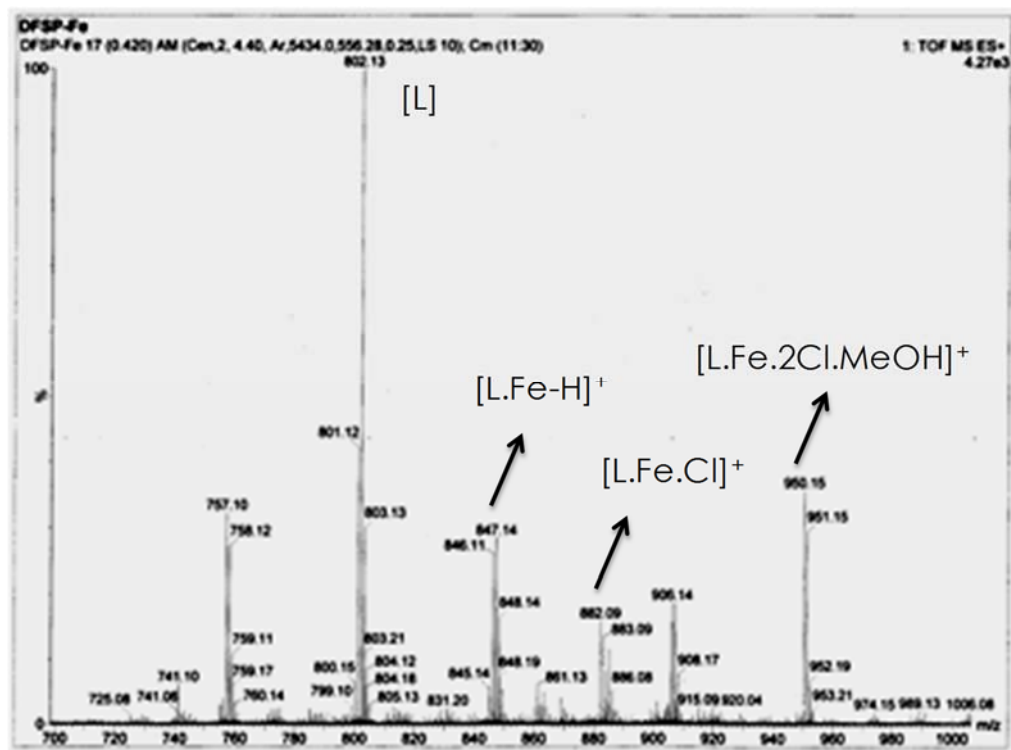

Figure S20. ESI-MS mass spectrum of **1** (0.5 mM) upon addition of  $\text{Fe}^{3+}$  (0.5 mM) at pH 7.4 in water

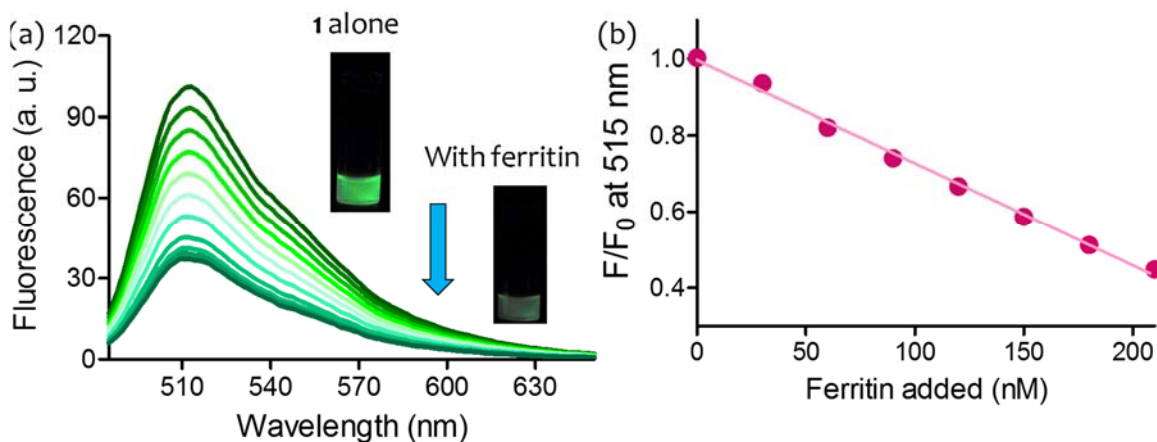

**Figure S21.** (a) Fluorescence titration of **1** (10  $\mu\text{M}$ ,  $\lambda_{\text{ex}} = 457 \text{ nm}$ ) with ferritin (0-300 nM) at pH 6.0 in water. (b) Change in emission intensity of **1** (10  $\mu\text{M}$ ,  $\lambda_{\text{ex}} = 457 \text{ nm}$ ) during titration with ferritin (0-220 nM)

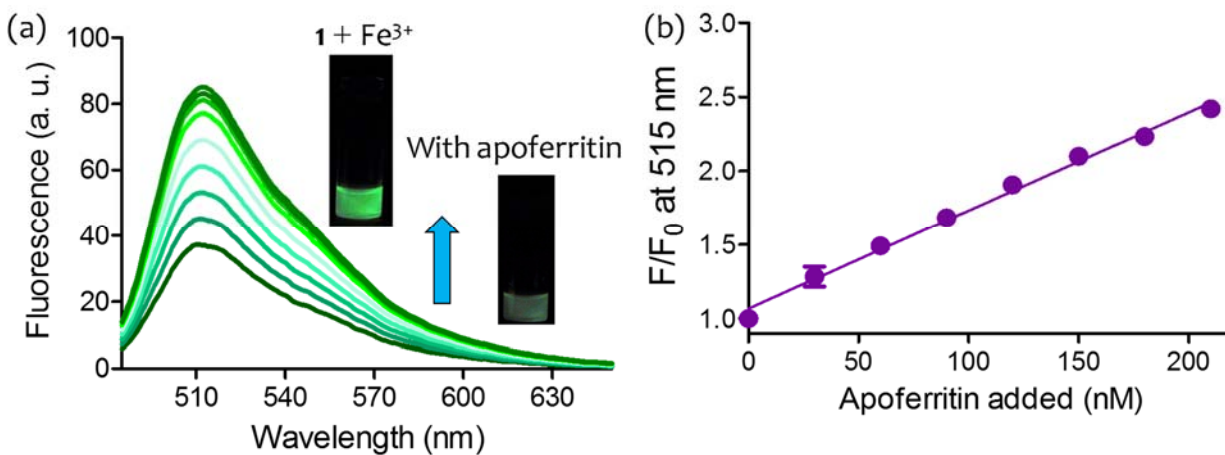

**Figure S22.** (a) Fluorescence titration of **1** +  $\text{Fe}^{3+}$  ( $[\mathbf{1}] = 10 \mu\text{M}$ ,  $[\text{Fe}^{3+}] = 10 \mu\text{M}$ ,  $\lambda_{\text{ex}} = 457 \text{ nm}$ ) with apoferritin (0-300 nM) at pH 6.0 in water; (b) Change in emission intensity of **1** +  $\text{Fe}^{3+}$  ( $[\mathbf{1}] = 10 \mu\text{M}$ ,  $[\text{Fe}^{3+}] = 10 \mu\text{M}$ ,  $\lambda_{\text{ex}} = 457 \text{ nm}$ ) during titration with apoferritin (0-220 nM) at pH 6.0 in water.

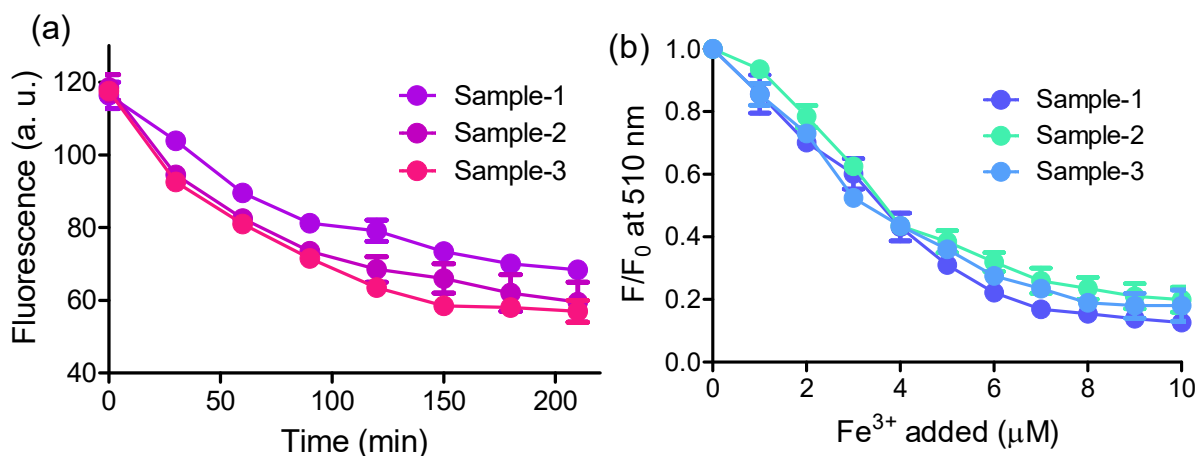

**Figure S23.** (a) Change in emission intensity of **1** (10 μM,  $\lambda_{\text{ex}} = 457 \text{ nm}$ ) at 515 nm with time (0-220 min) in blood serum samples (2.5/7.5 v/v with pH 7.4 buffer) at pH 4.5. (b) Change in emission intensity of **1** (10 μM,  $\lambda_{\text{ex}} = 457 \text{ nm}$ ) at 515 nm upon addition of Fe<sup>3+</sup> in different blood serum samples (2.5/7.5 v/v with pH 7.4 buffer) at pH 7.4.

| Blood serum samples | Serum Iron (μM) From present method | Average (μM) | % RSD | Fe <sup>3+</sup> unbound (μM) | LIBC (μM) = Fe <sup>3+</sup> added – Fe <sup>3+</sup> unbound (Iron added: 20 μM) | TIBC (μM) = Serum Iron + Unbound Iron | Average (μM) | % RSD |
|---------------------|-------------------------------------|--------------|-------|-------------------------------|-----------------------------------------------------------------------------------|---------------------------------------|--------------|-------|
| Sample 1            | 3.65                                | 3.64         | 1.65  | 6.77                          | 13.23                                                                             | 16.88                                 | 16.83        | 0.58  |
|                     | 3.58                                |              |       | 6.86                          | 13.14                                                                             | 16.72                                 |              |       |
|                     | 3.70                                |              |       | 6.80                          | 13.20                                                                             | 16.90                                 |              |       |
| Sample 2            | 4.25                                | 4.20         | 1.04  | 6.41                          | 13.59                                                                             | 17.84                                 | 17.84        | 0.09  |
|                     | 4.18                                |              |       | 6.33                          | 13.67                                                                             | 17.85                                 |              |       |
|                     | 4.17                                |              |       | 6.35                          | 13.65                                                                             | 17.82                                 |              |       |
| Sample 3            | 4.62                                | 4.60         | 0.55  | 5.82                          | 14.18                                                                             | 18.80                                 | 18.83        | 0.19  |
|                     | 4.57                                |              |       | 5.70                          | 14.30                                                                             | 18.87                                 |              |       |
|                     | 4.60                                |              |       | 5.78                          | 14.22                                                                             | 18.82                                 |              |       |

**Table S2.** Estimation of Fe<sup>3+</sup> in different diluted blood serum samples (2.5/7.5 v/v with pH 7.4 buffer) using compound **1** (10 μM,  $\lambda_{\text{ex}} = 457 \text{ nm}$ ) monitored at 515 nm.

| Blood serum samples | Serum Iron In $\mu\text{g/dL}$ (present method) | Serum Iron In $\mu\text{g/dL}$ (AAS method) | % Error | TIBC In $\mu\text{g/dL}$ (present method) | TIBC In $\mu\text{g/dL}$ (AAS method) | % Error | Transferrin saturation (%) (present method) | Transferrin saturation (%) (AAS method) | % Error |
|---------------------|-------------------------------------------------|---------------------------------------------|---------|-------------------------------------------|---------------------------------------|---------|---------------------------------------------|-----------------------------------------|---------|
| Sample 1            | 61.15                                           | 62.50                                       | 2.39    | 282.80                                    | 285.28                                | 1.16    | 21.6                                        | 21.9                                    | 1.37    |
|                     | 59.98                                           |                                             |         | 280.12                                    |                                       |         |                                             |                                         |         |
|                     | 61.99                                           |                                             |         | 283.13                                    |                                       |         |                                             |                                         |         |
| Sample 2            | 71.20                                           | 72.58                                       | 3.15    | 298.88                                    | 308.34                                | 3.19    | 23.6                                        | 23.5                                    | 0.43    |
|                     | 70.03                                           |                                             |         | 299.00                                    |                                       |         |                                             |                                         |         |
|                     | 69.86                                           |                                             |         | 298.55                                    |                                       |         |                                             |                                         |         |
| Sample 3            | 77.04                                           | 78.15                                       | 1.61    | 314.97                                    | 320.12                                | 1.45    | 24.3                                        | 24.4                                    | 0.40    |
|                     | 76.56                                           |                                             |         | 316.14                                    |                                       |         |                                             |                                         |         |
|                     | 77.07                                           |                                             |         | 315.30                                    |                                       |         |                                             |                                         |         |

**Table S3.** Determination of Diagnostic Parameters Associated with Serum Iron Estimation

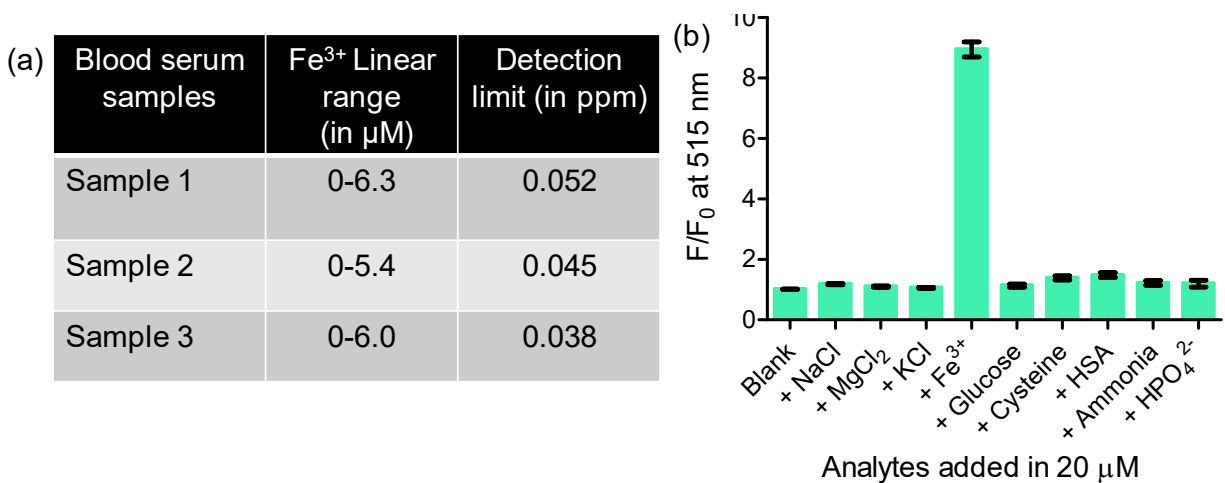

**Figure S24.** (a) Linear range as well as detection limit for  $\text{Fe}^{3+}$  sensing in different diluted blood serum samples (2.5/7.5 v/v with pH 7.4 buffer) using compound **1** (10  $\mu\text{M}$ ,  $\lambda_{\text{ex}} = 457 \text{ nm}$ ) monitored at 515 nm. (b) Change in emission intensity of **1** at 515 nm in presence of different analytes in diluted blood serum samples (2.5/7.5 v/v with pH 7.4 buffer).

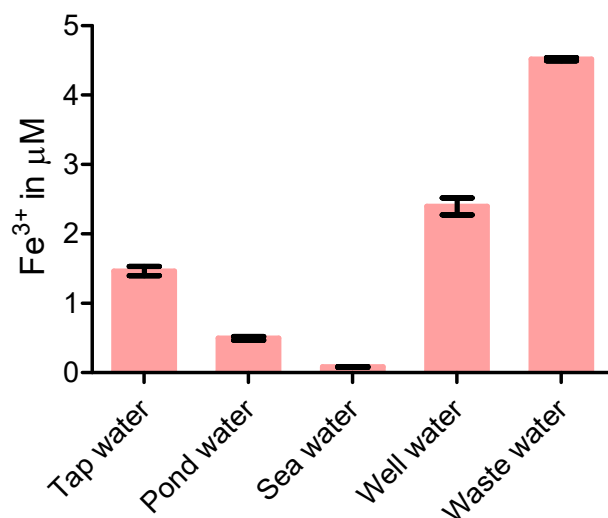

**Figure S25.** Estimation of Fe<sup>3+</sup> (in μM) in different natural water samples using **1** (10 μM) at pH 7.4 in water.

| Water Sources | Fe <sup>3+</sup> level (n=3) | Fe <sup>3+</sup> level (n=3) | (in % level) |
|---------------|------------------------------|------------------------------|--------------|
|               | Proposed method<br>In ppb    | AAS method<br>In ppb         | Deviation    |
| Tap           | 166.5 ± 5.2                  | 170.2 ± 1.2                  | 2.9          |
| Pond          | 57.0 ± 1.5                   | 52.4 ± 0.5                   | 9.5          |
| Sea           | 9.8 ± 0.5                    | 8.5 ± 0.8                    | 15.2         |
| Well          | 247.2 ± 9.8                  | 243.5 ± 2.5                  | 1.6          |
| Waste         | 488.4 ± 10.6                 | 490.2 ± 4.2                  | 0.4          |

**Table S4.** Estimation of Fe<sup>3+</sup> (in μM) in different natural water samples using both present method as well as AAS method.



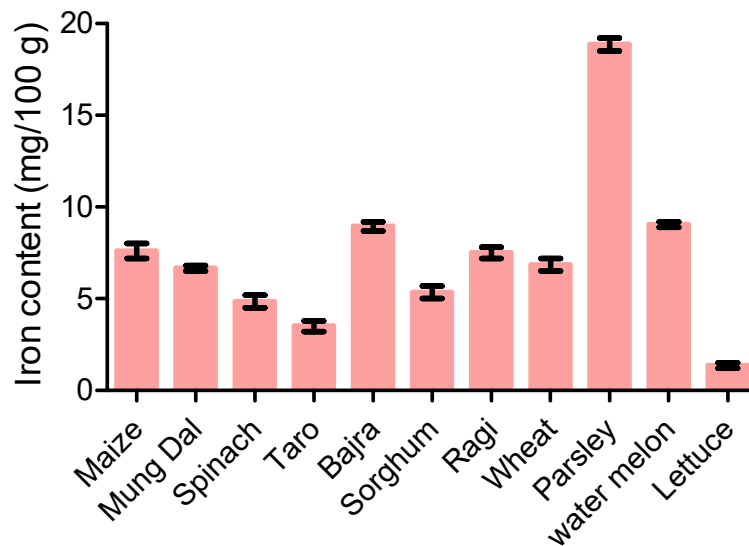

**Figure S26.** Estimation of iron (mg/100 g) in different agricultural samples using **1** (10  $\mu$ M,  $\lambda_{ex}$  = 457 nm) at pH 7.4 in water

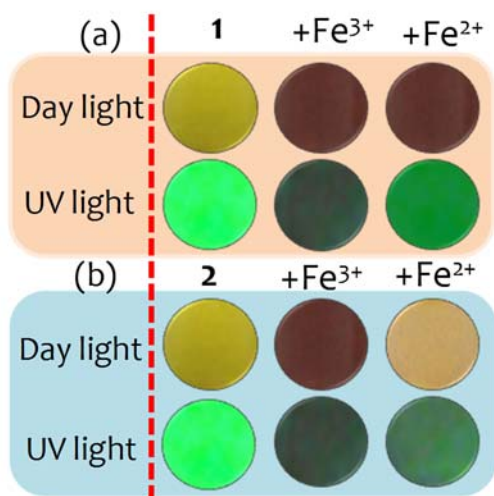

**Figure S27.** Compound coated color strips for discrimination of Fe<sup>3+</sup> and Fe<sup>2+</sup> using compounds **1** and **2**.

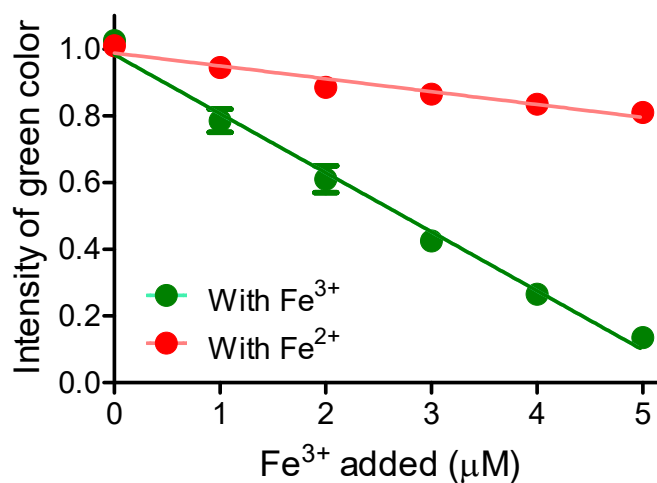

**Figure S28.** Compound coated color strips for discrimination of Fe<sup>3+</sup> and Fe<sup>2+</sup> using compounds 1.

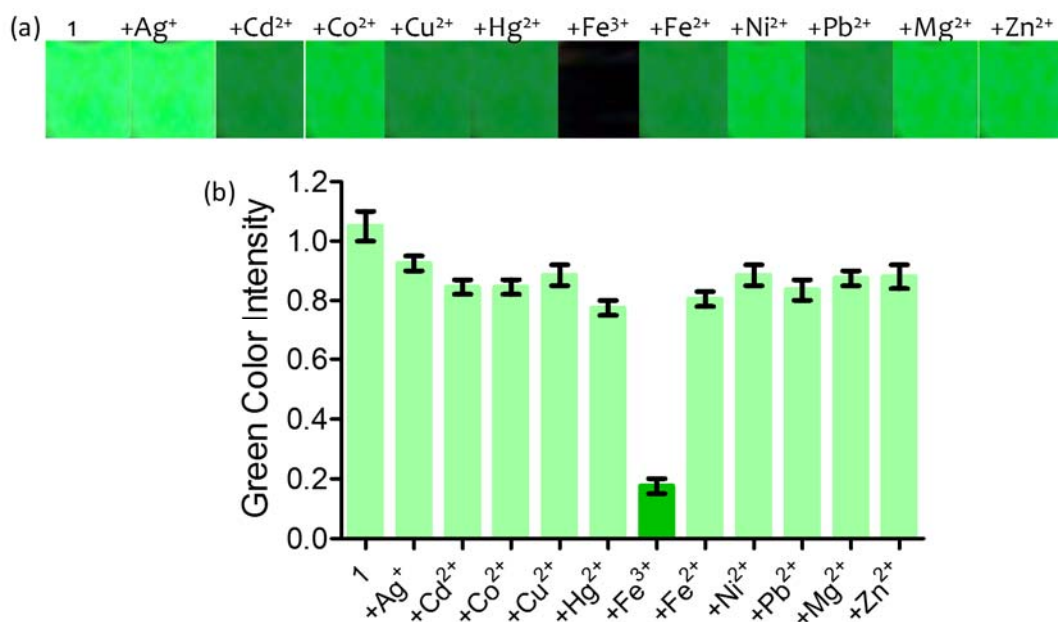

**Figure S29.** (a) Color strips for on-site detection of Fe<sup>3+</sup>; selectivity was checked in presence of different metal ions. (b) Quantify the extent of emission change of color strips upon addition of different metal ions at pH 7.4 in water.

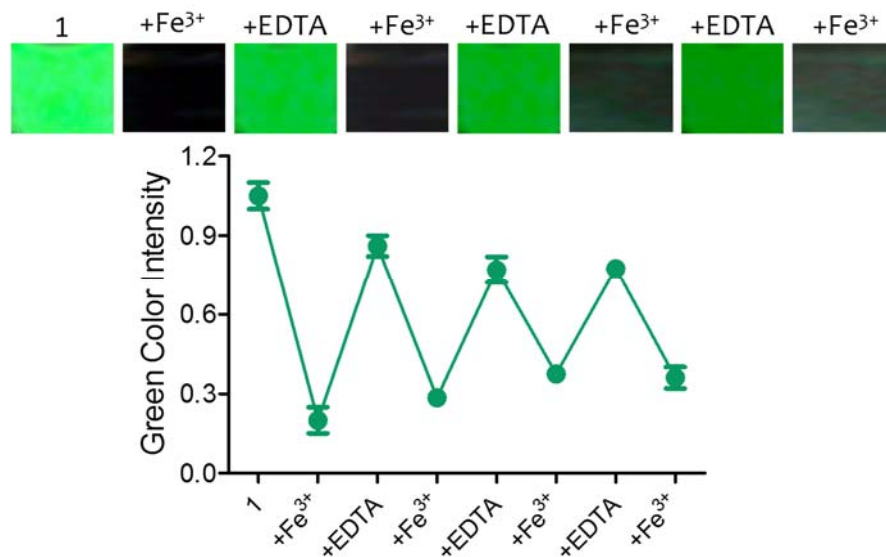

**Figure S30.** (a) Color strips for reversible detection of Fe<sup>3+</sup>; equimolar EDTA was used in each time. (b) Quantify the extent of emission change of color strips upon sequential addition of Fe<sup>3+</sup> and EDTA.

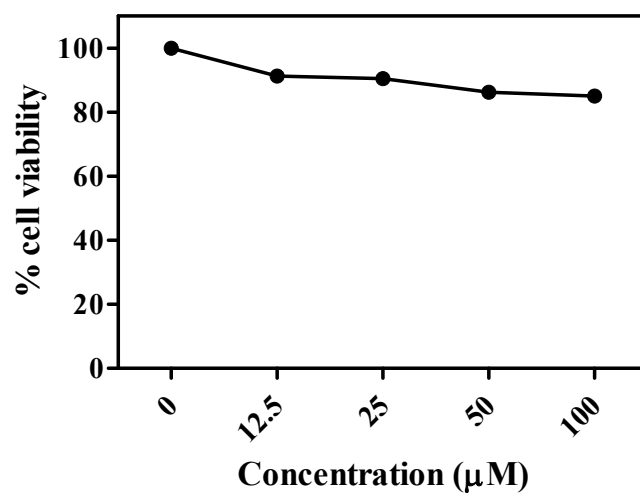

**Figure S31.** Plot of %cell viability against concentration of 1 in HeLa cells for 72 h treatment period.
